# Supplementary material for: Surface Wettability Tuning of Acrylic Resin Photoresist and Its Aging Performance
Source: MDPI journal article supplement (doi:10.3390/s21144866), 2021-07-19
Supplement: s1 [file s1]

### Chemical Characterization of HN Photoresist

The chemical groups were characterized by fourier transform infrared spectrometer (FT-IR, Thermo Scientific Nicolet iS50, Thermo-Nicolet, Waltham, MA, USA) with the support of the ATP appendix (iS50 ATP). The fabricated HN photoresist film on glass was characterized by the FT-IR machine with air as the reference.

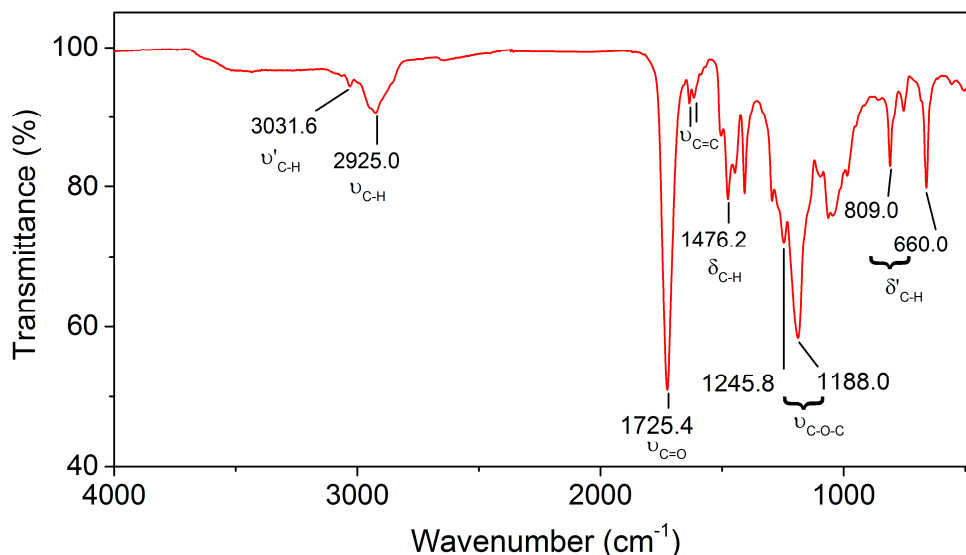

**Figure S1.** FT-IR spectrum of HN photoresist. (3031.6 cm<sup>-1</sup>, C-H (benzene series); 2925.0 cm<sup>-1</sup>, C-H (-CH<sub>2</sub>); 1725.4 cm<sup>-1</sup>, C=O (-COOR); 1634.8 cm<sup>-1</sup> and 1616.5 cm<sup>-1</sup>, C=C; 1476.2 cm<sup>-1</sup>, C-H(-CH<sub>2</sub>); 1407.2 cm<sup>-1</sup>, C-H(-CH<sub>2</sub>-C=O); 1245.8 cm<sup>-1</sup> and 1188.0 cm<sup>-1</sup>, C-O-C (-COOR); 809.0 cm<sup>-1</sup> and 660.0 cm<sup>-1</sup>, C-H (benzene series, from the phenol aldehyde modification part to the resin).

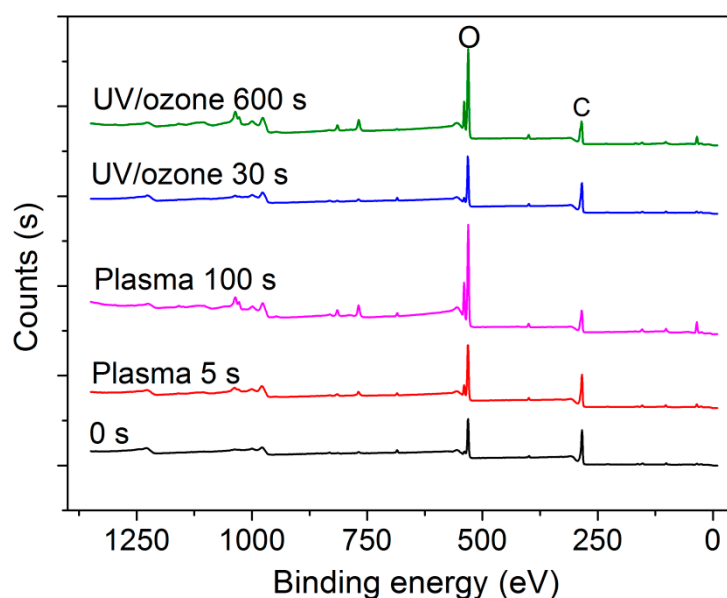

**Figure S2.** The survey spectrum from XPS with different oxygen plasma or UV/ozone treatment time (0 s, plasma 5 s, plasma 100 s, UV/ozone 30 s, and UV/ozone 600 s). The carbon (C) and oxygen (O) peaks are pointed out.

### Optical Performance of HN Photoresist Film before or after Hydrophilic Treatment

The transmittance was used to characterize the optical performance before or after oxygen plasma or UV/ozone treatment measured by a UV-vis spectrophotometer (V-630, Jasco, Japan) with a wavelength range from 400 nm to 800 nm and reference of air. Meanwhile, photos were taken by a camera (EOS 80D, Nikon, Japan).

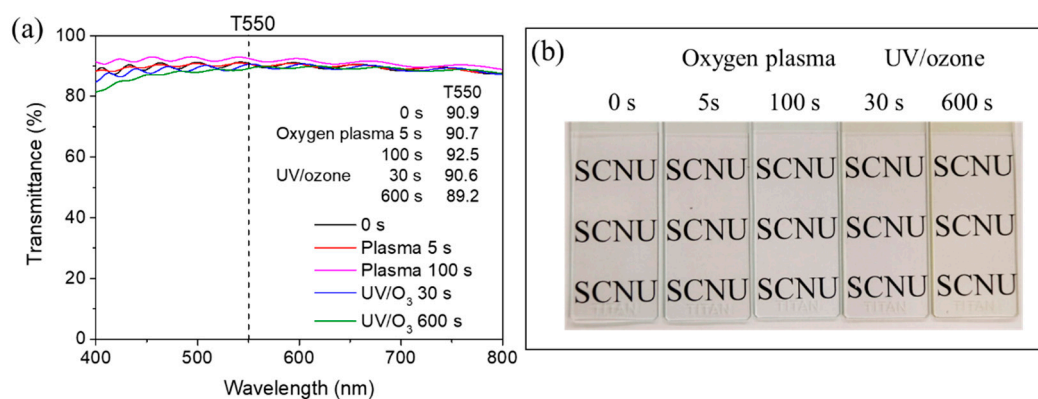

**Figure S3.** Transmittance curve (a) and the photos (b) of samples without treatment (0 s) or after oxygen plasma treatment (5 s or 100 s) or UV/ozone treatment (30 s or 600 s). The wavelength range is 400–800 nm, and the reference is air.
